# Supplementary material
Source: publisher site journal article supplement (https://www.degruyterbrill.com/publication/isbn/9783486816624/downloadAsset/9783486816624_Inhaltsverzeichnis.pdf)
Supplement: Supplementary file 1 [file 9783486816624_Inhaltsverzeichnis.pdf]

# Inhaltsverzeichnis

|                                                   |           |
|---------------------------------------------------|-----------|
| <b>Vorwort</b>                                    | <b>IX</b> |
| <b>1 Einführung</b>                               | <b>1</b>  |
| <b>2 Grundlagen der Informatik</b>                | <b>4</b>  |
| 2.1 Einführung                                    | 4         |
| 2.2 Kurzer geschichtlicher Abriss                 | 5         |
| 2.3 Exkurs in die mathematische Logik             | 8         |
| 2.4 Zahlensysteme                                 | 12        |
| 2.4.1 Bits und Bytes                              | 12        |
| 2.4.2 Dual- und Dezimalsystem                     | 12        |
| 2.5 Codierung                                     | 14        |
| 2.5.1 Zahldarstellungen                           | 14        |
| 2.5.2 Codierung von Zeichen                       | 15        |
| 2.5.3 Gepackte Zahlendarstellungen                | 16        |
| 2.5.4 Fest- und Gleitkommadarstellungen           | 17        |
| 2.5.5 Codierung von Dateien                       | 18        |
| 2.5.6 Einige Dokumentenformate                    | 21        |
| 2.5.6.1 RTF: Rich Text Format                     | 21        |
| 2.5.6.2 HTML: HyperText Markup Language           | 21        |
| 2.5.6.3 XML: Extensible Markup Language           | 22        |
| 2.5.6.4 PDF: Portable Document Format             | 22        |
| 2.6 Software und Betriebssysteme                  | 24        |
| 2.6.1 Software                                    | 24        |
| 2.6.2 Algorithmen und Programme                   | 25        |
| 2.6.3 Programmiersprachen                         | 27        |
| 2.6.3.1 1. Generation: Maschinensprachen          | 27        |
| 2.6.3.2 2. Generation: Assembler                  | 28        |
| 2.6.3.3 3. Generation: Höhere Programmiersprachen | 28        |

|            |                                                                 |           |
|------------|-----------------------------------------------------------------|-----------|
| 2.6.3.4    | 4. Generation: Applikative Programmiersprachen (4GL)            | 28        |
| 2.6.3.5    | 5. Generation: Very High Level Languages                        | 29        |
| 2.6.3.6    | Einsatzgebiete von Programmiersprachen                          | 29        |
| 2.6.4      | Betriebssysteme                                                 | 30        |
| 2.6.4.1    | Betriebsarten                                                   | 31        |
| 2.6.4.2    | Verschiedene Betriebssysteme in der Praxis                      | 32        |
| <b>2.7</b> | <b>Internet</b>                                                 | <b>33</b> |
| 2.7.1      | Geschichte des Internet                                         | 34        |
| 2.7.2      | Dienste des Internet                                            | 35        |
| 2.7.2.1    | E-Mail                                                          | 35        |
| 2.7.2.2    | Mailinglisten                                                   | 36        |
| 2.7.2.3    | Newsgruppen                                                     | 36        |
| 2.7.2.4    | Telnet                                                          | 36        |
| 2.7.2.5    | FTP - File Transfer Protocol (Dateitransfer)                    | 37        |
| 2.7.2.6    | Chat                                                            | 38        |
| 2.7.2.7    | WWW - World Wide Web                                            | 38        |
| 2.7.3      | Multimedia im Internet: Grafik, Sound und Video                 | 39        |
| 2.7.3.1    | Grafikformate                                                   | 40        |
| 2.7.3.2    | Formate für Video und Audio                                     | 41        |
| 2.7.4      | Intranet und Extranet                                           | 42        |
| <b>2.8</b> | <b>Einführung in die Kryptologie</b>                            | <b>43</b> |
| 2.8.1      | Einleitung                                                      | 43        |
| 2.8.2      | Symmetrische Verfahren ( <i>private key</i> )                   | 44        |
| 2.8.3      | Asymmetrische Kryptosysteme ( <i>public key</i> )               | 46        |
| 2.8.4      | Secure Socket Layer (SSL)                                       | 48        |
| 2.8.5      | Ausblick: Steganographie                                        | 50        |
| <b>3</b>   | <b>Analyse und Einführung betrieblicher Informationssysteme</b> | <b>51</b> |
| <b>3.1</b> | <b>Grundlagen der Systemanalyse</b>                             | <b>51</b> |
| <b>3.2</b> | <b>Modelle</b>                                                  | <b>53</b> |
| 3.2.1      | Datenorientierte Sicht                                          | 56        |
| 3.2.2      | Prozessorientierte Sicht                                        | 58        |
| 3.2.3      | Objektorientierte Sicht                                         | 63        |

|            |                                                           |           |
|------------|-----------------------------------------------------------|-----------|
| <b>3.3</b> | <b>Phasenkonzept</b>                                      | <b>68</b> |
| 3.3.1      | Projektinitialisierung                                    | 69        |
| 3.3.1.1    | Zielvorgaben                                              | 70        |
| 3.3.1.2    | Wirtschaftlichkeitsanalyse                                | 71        |
| 3.3.1.3    | Projektorganisation                                       | 74        |
| 3.3.2      | Projektplanung                                            | 77        |
| 3.3.3      | Projektdurchführung                                       | 80        |
| 3.3.3.1    | Ist-Analyse                                               | 80        |
| 3.3.3.2    | Soll-Konzept                                              | 84        |
| 3.3.3.3    | Realisierung und Einführung                               | 86        |
| 3.3.4      | Projektabschluss                                          | 87        |
| <b>4</b>   | <b>Anwendungsfelder betrieblicher Informationssysteme</b> | <b>90</b> |
| <b>4.1</b> | <b>Datenbankanwendungen</b>                               | <b>90</b> |
| 4.1.1      | Grundlagen relationaler Datenbanken                       | 90        |
| 4.1.1.1    | Datenbankmodelle                                          | 90        |
| 4.1.1.2    | Anforderungen an relationale Datenbanksysteme             | 91        |
| 4.1.1.3    | Drei-Ebenen-Architektur                                   | 93        |
| 4.1.1.4    | Komponenten eines Datenbankmanagementsystems              | 94        |
| 4.1.2      | Der Datenbank-Lebenszyklus                                | 97        |
| 4.1.2.1    | Anforderungsanalyse und -spezifikation                    | 97        |
| 4.1.2.2    | Konzeptioneller Entwurf                                   | 98        |
| 4.1.2.3    | Logischer Entwurf                                         | 98        |
| 4.1.2.4    | Implementierungsentwurf                                   | 102       |
| 4.1.2.5    | Implementierung                                           | 107       |
| 4.1.2.6    | Arbeiten mit der Datenbank (Betrieb und Wartung)          | 108       |
| 4.1.3      | Data Warehouse-Systeme                                    | 108       |
| 4.1.3.1    | Architektur                                               | 109       |
| 4.1.3.2    | Extraktion                                                | 110       |
| 4.1.3.3    | Speicherung                                               | 111       |
| 4.1.3.4    | Präsentation und Berichterstellung                        | 115       |

|            |                                                                     |            |
|------------|---------------------------------------------------------------------|------------|
| <b>4.2</b> | <b>Enterprise Resource Planning (ERP) -Systeme</b>                  | <b>119</b> |
| 4.2.1      | Kennzeichen                                                         | 120        |
| 4.2.2      | Funktionalität                                                      | 122        |
| <b>4.3</b> | <b>E-Business und seine Unterstützung durch Informationssysteme</b> | <b>126</b> |
| 4.3.1      | E-Business-Begriffe                                                 | 126        |
| 4.3.2      | E-Commerce                                                          | 128        |
| 4.3.3      | E-Procurement                                                       | 131        |
| 4.3.4      | E-Organisation                                                      | 137        |
| 4.3.5      | Supply Chain Management                                             | 138        |
| 4.3.6      | Customer Relationship Management                                    | 143        |
| 4.3.7      | E-Communities                                                       | 145        |
| 4.3.8      | E-Government und E-Policy                                           | 148        |
|            | <b>Lösungshinweise</b>                                              | <b>154</b> |
|            | <b>Literaturverzeichnis</b>                                         | <b>165</b> |
|            | <b>Stichwortverzeichnis</b>                                         | <b>169</b> |
